# Supplementary material
Source: Research Square preprint supplement (doi:10.21203/rs.3.rs-8489431/v1)
Supplement: Supplementary file 1 [file 3e5c076a65a6ce046f39f1da.docx]

**- Supplementary Information -**

**Nutrient stress decouples the extent and intensity of root-driven destabilization of mineral-associated organic matter**

*Mariela Garcia Arredondo1,4*, Sherlynette Pérez Castro2, Faith Aguirre Mendoza3, Glyn Mardis1, Charlotte Koch1, Malak M. Tfaily3, Zoe Cardon2, and Marco Keiluweit1,5**

*1University of Massachusetts Amherst, School of Earth & Sustainability, Amherst, MA, USA 01003*

*2Marine Biological Laboratory, Woods Hole, MA, USA 02543*

*3University of Arizona, Department of Environmental Science, Tucson, AZ, USA 85719*

*4Yale Center for Natural Carbon Capture, New Haven, CT, USA*

*5University of Lausanne, Faculty of Geosciences and Environment, 1015 Lausanne, Switzerland*

*Corresponding author: Prof. Dr. Marco Keiluweit, Email:[marco.keiluweit@unil.ch](mailto:marco.keiluweit@unil.ch)

**Keywords:** Rhizosphere; mineral-associated organic matter; nitrogen limitation; root foraging; soil carbon cycling; plant–soil feedbacks

**Table S1: Mixed effects model results for individual and interactive treatment effects on important controls of MAOM destabilization.** P-values < 0.05 are shown in bold.

| Variable | Moisture | N Availability | Moisture: N Availability |
| --- | --- | --- | --- |
| Shoot biomass (g) | **<.0001** | **<.0001** | **<.0001** |
| Root biomass (g) | 0.33 | **0.001** | 0.34 |
| Plant height (cm) | **<.0001** | **0.002** | 0.55 |
| C:N root biomass | **0.01** | **<.0001** | 0.22 |
| C:N bulk soil | 0.13 | **0.02** | 0.31 |
| Microbial biomass nitrogen  (nmol per g soil) | 0.21 | **0.01** | 0.33 |
| Microbial biomass carbon  (nmol per g soil) | 0.19 | 0.08 | **0.04** |
| Total extractable Fe in rhizosphere soil  (mg g-1) | 0.94 | **0.01** | 1.00 |

**Table S2: Final soil chemical and biological values per treatment.** Standard error of the mean reported in parentheses, significance at a Tukey’s HSD p < 0.05 (n=5).

| Nutrient | Watering | Shoots: Roots | C:N Roots | C:N MBC | C:N Soils | pHi | pHf | Soil 13Cf (µmol g-1 soil) | Total Extractable Fe (mg g soil-1) |
| --- | --- | --- | --- | --- | --- | --- | --- | --- | --- |
| +N | +H2O | 8.6 (.83) A | 50 (3.6) B | 7.3 (1.2) AB | 14 (.23) B | 4.6 (.33) A | 5.4 (.03) A | 4.6 (.17) AB | 4.7 (.15) A |
| +N | -H2O | 6.6 (1.3) A | 32 (1.6) C | 6.2 (1.5) B | 13 (.13) B | - | 5.0 (.05) B | 4.7 (.11) A | 4.7 (.20) A |
| -N | +H2O | 8.7 (1.6) A | 81 (7.3) A | 7.8 (1.2) AB | 15 (.69) AB | 4.7 (.33) A | 4.8 (.03) C | 4.6 (.11) AB | 4.0 (.17) A |
| -N | -H2O | 7.8 (1.3) A | 76 (2.5) A | 12 (.56) A | 15 (.36) A | - | 4.8 (.03) C | 4.2 (.10) B | 4.0 (.30) A |

**Table S3: Compound-like classes of dissolved organic carbon compounds detected via FTICR-MS.** Differences between time points are provided only within a treatment for a compound-like class denoted by capital letters at p < 0.05 level (Tukey’s HSD), if there are no letters there was no significant difference between the means, numbers in parenthesis show standard error of the means (n = 5).

| Treatment | Week | Amino Sugars | Carbohydrates | Condensed Hydrocarbons | Lignin | Lipids | Proteins | Tannins | Unsaturated Hydrocarbons |
| --- | --- | --- | --- | --- | --- | --- | --- | --- | --- |
| +N +H2O | 3 | 6.6 (1.3) A | 7.0 (1.0) C | 12 (1.8) B | 30 (4.9) B | 15 (3.1) A | 19 (2.6) A | 2.9 (.25) A | 7.3 (.62) A |
| 5 | 5.7 (1.0) AB | 12 (2.8) ABC | 14 (.75) AB | 37 (4.8) AB | 8.0 (3.7) AB | 12 (3.2) ABC | 1.4 (.38) AB | 11 (1.5) B |
| 6 | 3.6 (.26) AB | 14 (1.1) AB | 15 (.17) AB | 46 (1.5) A | 2.0 (.32) B | 6.4 (.34) C | 1.0 (.21) B | 13 (.55) B |
| 9 | 4.4 (.34) AB | 14 (2.2) AB | 12 (.78) B | 46 (1.9) A | 3.3 (1.1) B | 7.9 (1.8) C | 1.1 (.05) B | 11 (.82) B |
| +N -H2O | 3 | 6.0 (1.3) | 8.3 (.73) A | 14 (2.3) | 36 (4.5) | 7.9 (1.1) | 17 (3.9) A | 2.9 (.44) | 8.4 (.87) BC |
| 5 | 3.9 (.32) | 14 (1.7) AB | 16 (.71) | 44 (1.7) | 2.8 (.28) | 6.1 (.73) B | 1.5 (.22) | 12 (.50) AB |
| 6 | 4.1 (.37) | 14 (2.5) AB | 15 (.59) | 39 (5.2) | 6.5 (4.2) | 7.9 (2.3) AB | 2.0 (.96) | 12 (.67) A |
| 9 | 4.4 (.14) | 16 (1.06) B | 14 (.98) | 42 (1.6) | 3.3 (.56) | 6.6 (.662) B | 1.2 (.14) | 12 (.72) A |
| -N +H2O | 3 | 3.5 (.13) | 12 (1.0) | 15 (.77) | 45 (1.1) | 4.8 (.27) A | 6.9 (.39) | 1.4 (.06) A | 11 (.47) AB |
| 5 | 4.0 (.27) | 13 (1.5) | 15 (.56) | 44 (2.0) | 3.5 (.13) B | 6.4 (.50) | 1.6 (.15) AB | 12 (.56) A |
| 6 | 3.3 (.13) | 12 (.74) | 15 (.24) | 45 (.79) | 4.6 (.19) A | 6.5 (.34) | 1.7 (.13) AB | 12 (.32) AB |
| 9 | 4.2 (.30) | 14 (.73) | 17 (.60) | 43 (.22) | 3.3 (.20) B | 7.0 (.26) | 1.9 (.06) B | 11 (.40) B |
| -N -H2O | 3 | 3.4 (.21) A | 16 (1.1) A | 16 (.75) A | 42 (1.7) | 3.2 (.26) | 5.6 (.30) A | 1.6 (.12) | 13 (.46) A |
| 5 | 4.3 (.57) AB | 15 (.71) AB | 15 (.30) A | 43 (1.8) | 3.1 (.30) | 6.3 (.59) AB | 1.6 (.14) | 12 (.21) A |
| 6 | 3.9 (.21) AB | 12 (.45) B | 16 (.30) A | 44 (1.5) | 3.5 (.20) | 6.8 (.38) AB | 1.7 (.10) | 12 (.88) A |
| 9 | 5.5 (.68) B | 12 (.41) B | 18 (.35) B | 38 (4.1) | 5.7 (1.9) | 9.3 (1.5) B | 1.8 (.20) | 9.3 (.13) B |


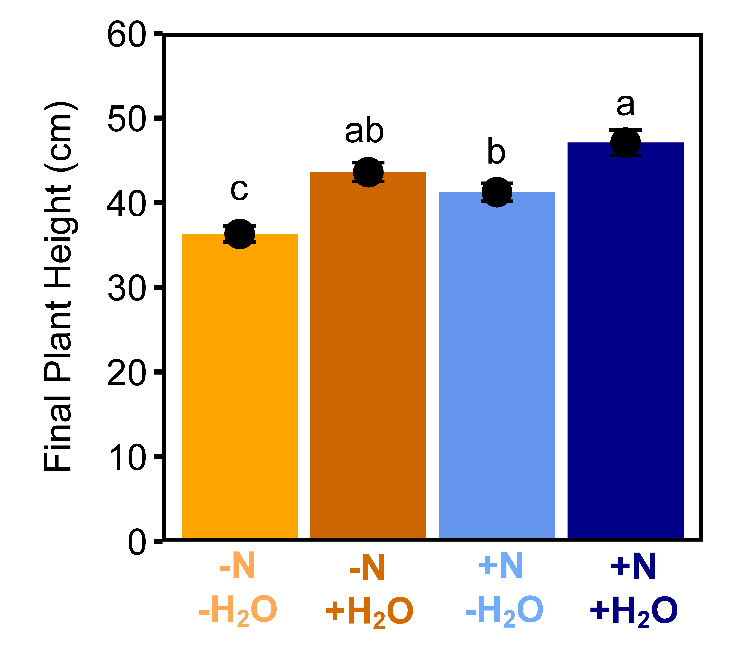


**Figure S1: Plant height measured at harvest.** Error bars represent the standard error from the mean (n=5) with lower case letters denoting significant differences between means (p < 0.05, Tukey’s HSD).


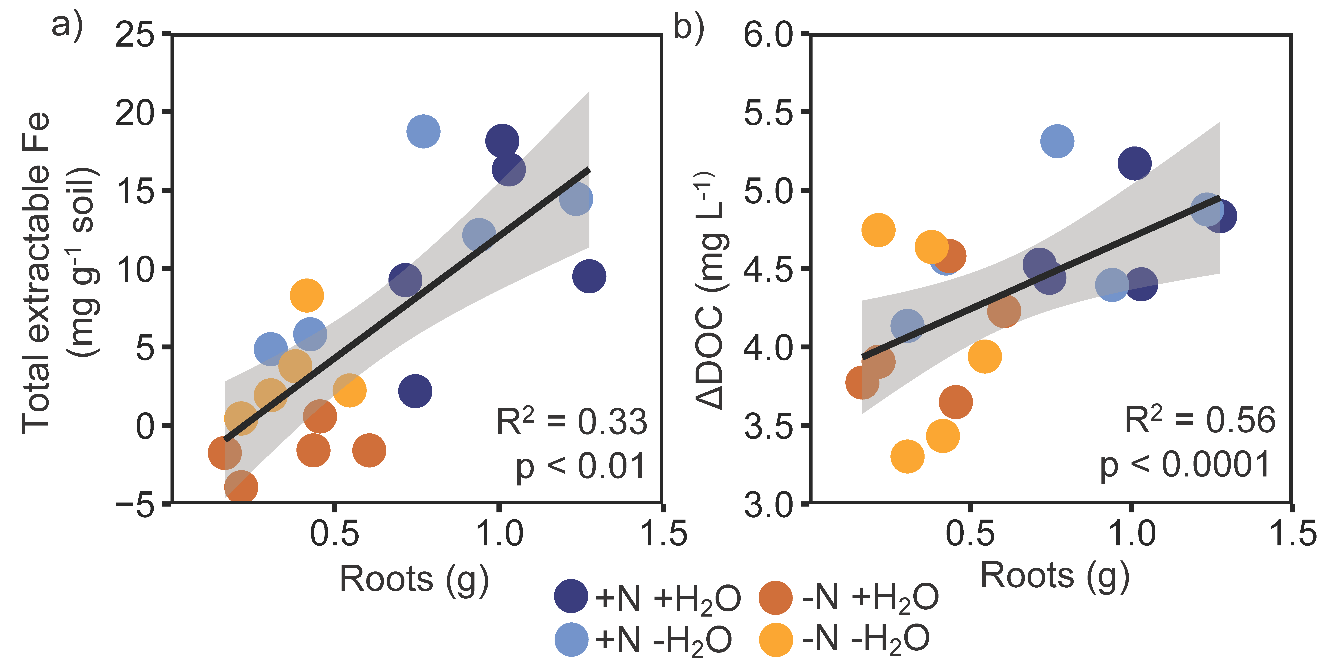


**Figure S2: Root effects on Fe mineral dissolution and DOC production.** (a) Total extractable Fe in rhizosphere soil, used here as an indicator of Fe mineral disruption, shown in relation to root biomass. (b) Change in porewater DOC concentration between weeks 3 and 9 (earliest and latest sampling points) plotted against root biomass. Coefficients of determination (R²) and significance levels are shown for linear model fits; shaded gray areas indicate 95% confidence intervals. Changes in DOC concentration are expressed as ΔDOC.


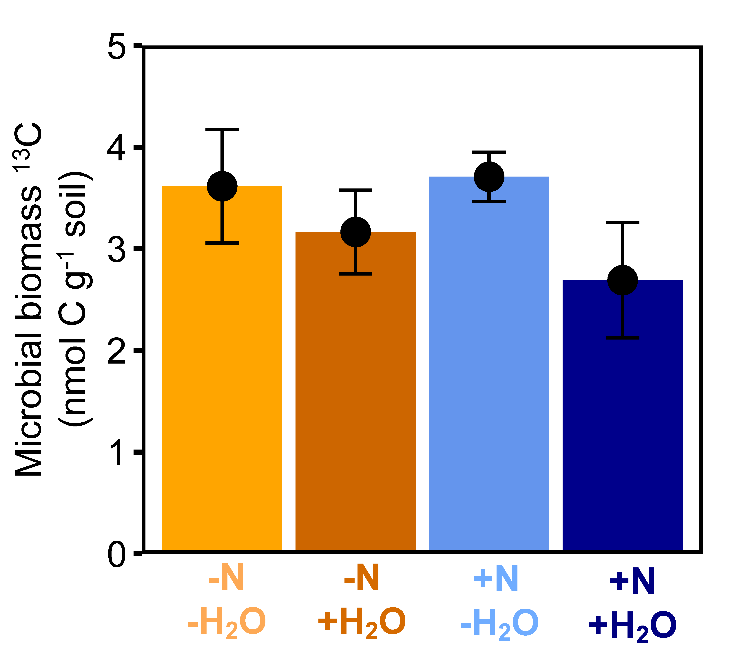


**Figure S3: Microbial biomass 13C carbon derived from soils at harvest.** Error bars represent the standard error from the mean (n=5) no lower case letters denote no significant differences between means.


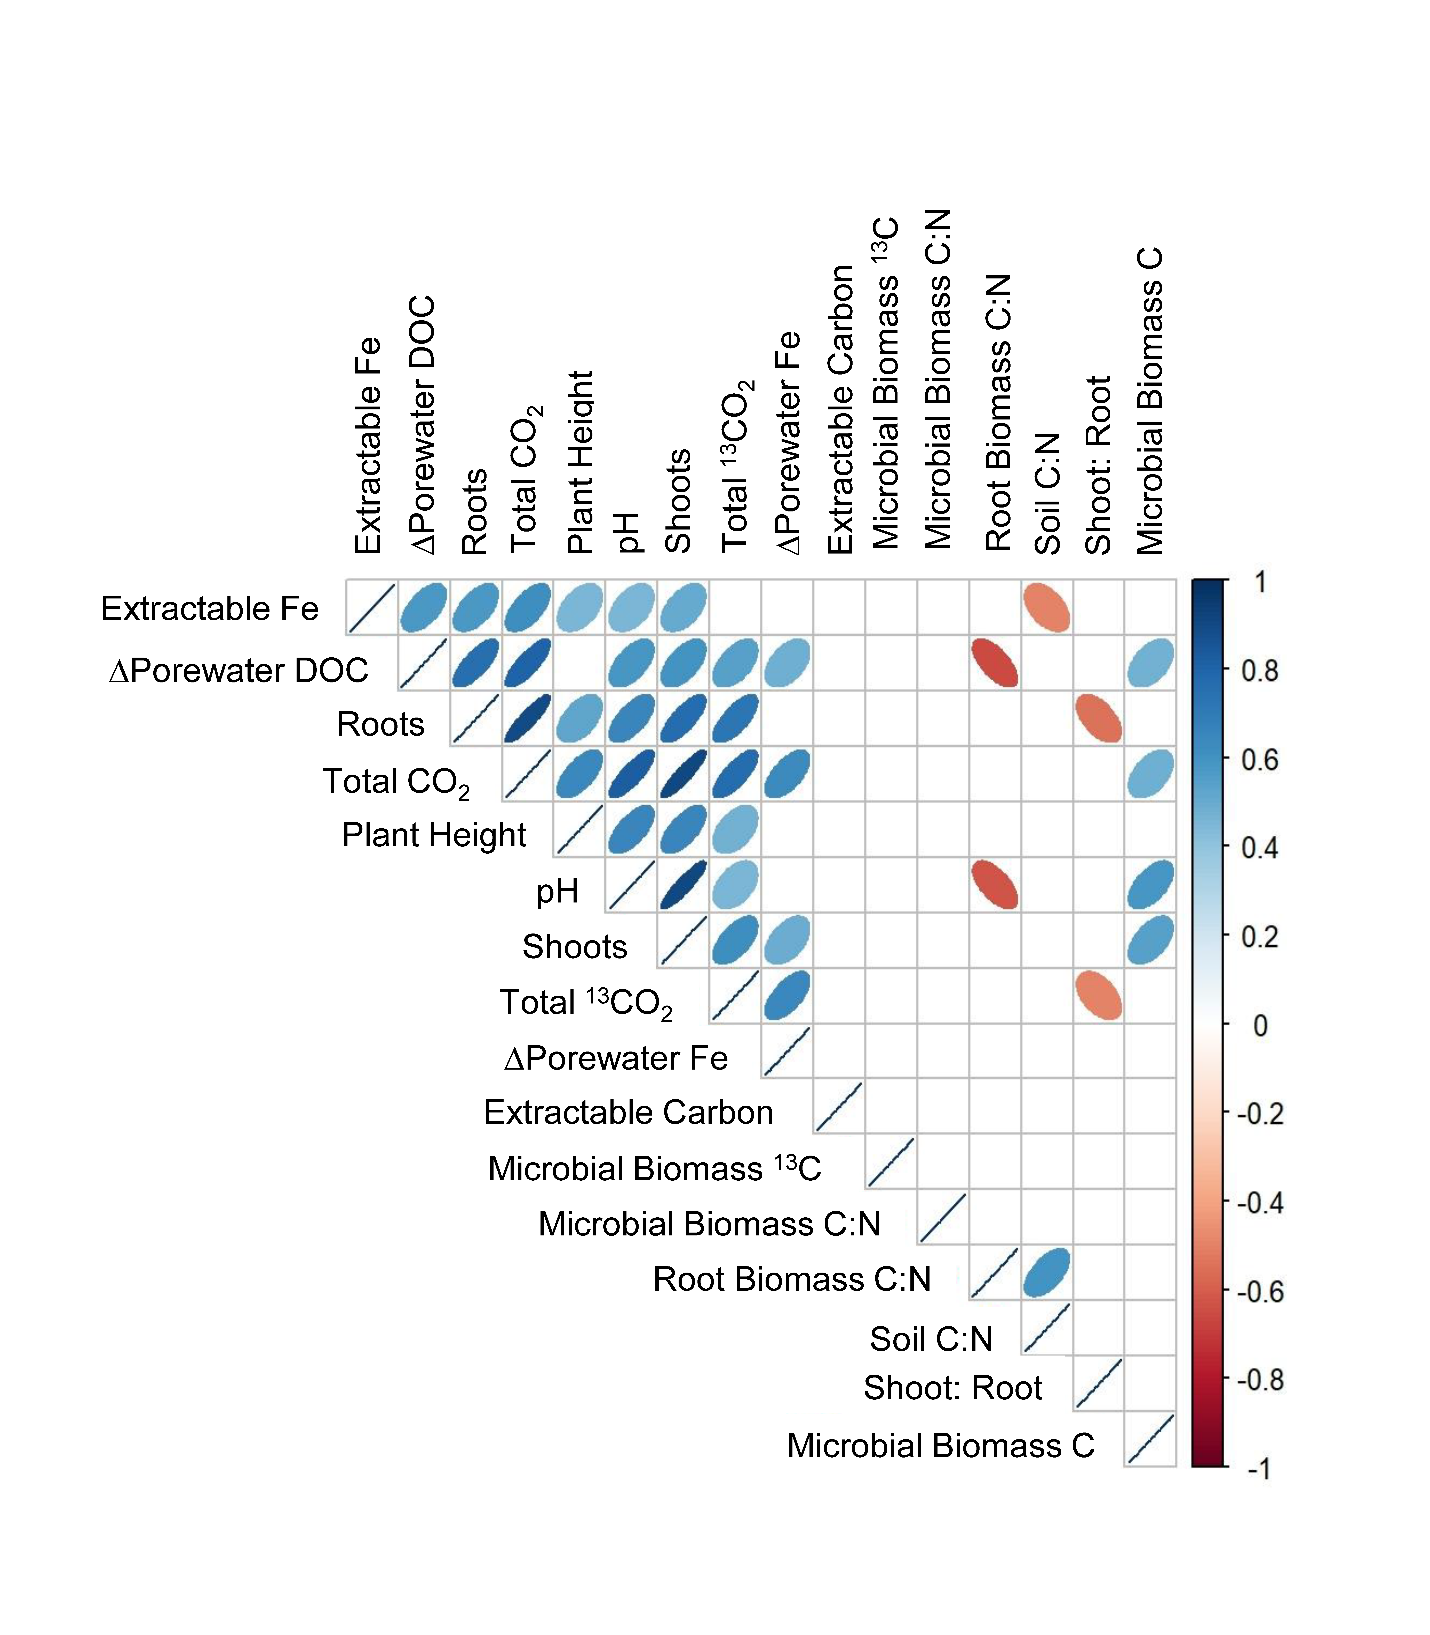


**Figure S4: Final harvest measurements correlation plot of Pearsons correlation values.** Bubbles are only present for significant correlations at p < 0.05. The closer the bubble represents the width of a line the closer the R2 value is to 1. Blue denotes a positive correlation and red denotes a negative correlation. Average flux differences to *a priori* measurements in porewater are denoted as ∆DOC and ∆Fe fluxes 1.

**
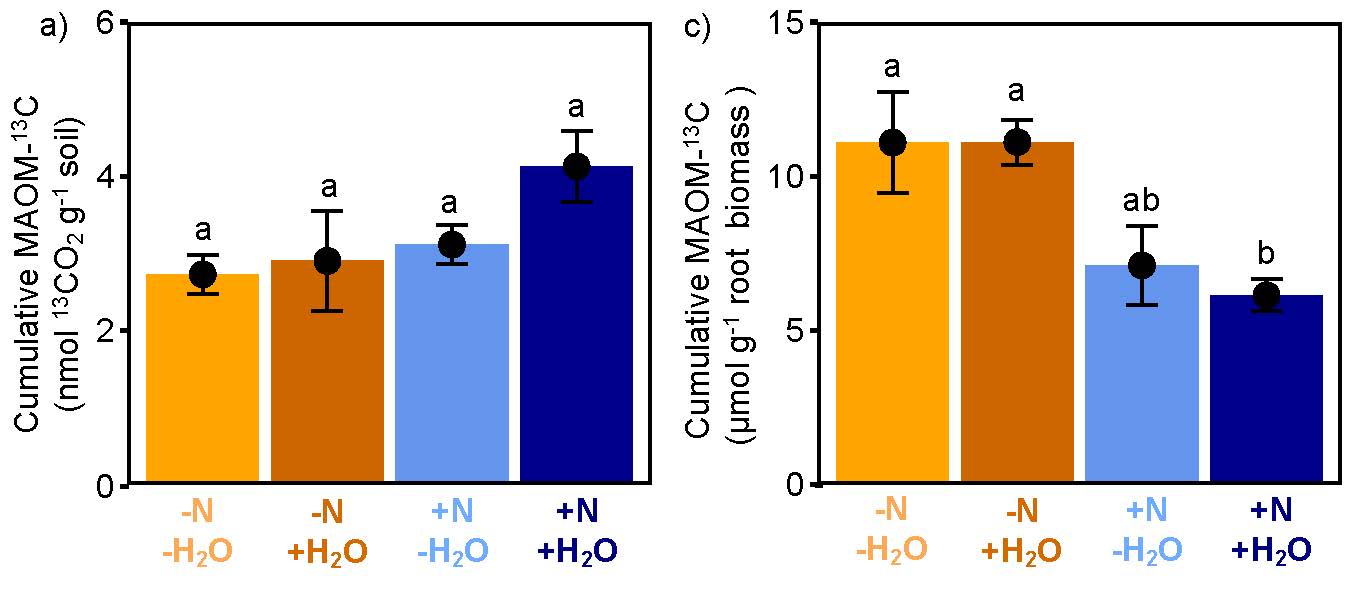
 Figure S5: Cumulative root-driven MAOM destabilization**

**(a)** Effects of nutrient and water availability on cumulative 13CO2 production from 13C-labeled MAOM. Effects of nutrient and water availability on cumulative MAOM-13C per unit of root biomass. **(b)** Error bars represent the standard error of the mean (n = 5). Significantly different means (n = 5) are denoted by lower case letters (Tukey’s HSD, *p* < 0.05).

**References**

1. Neff, J. C. & Hooper, D. U. Vegetation and climate controls on potential CO2 , DOC and DON production in northern latitude soils. *Glob. Change Biol.* **8**, 872–884 (2002).
